# Supplementary material
Source: PubMed Central journal article supplement (PMC11237684)
Supplement: iai.00024-24-s0001.pdf [file iai.00024-24-s0001.pdf]

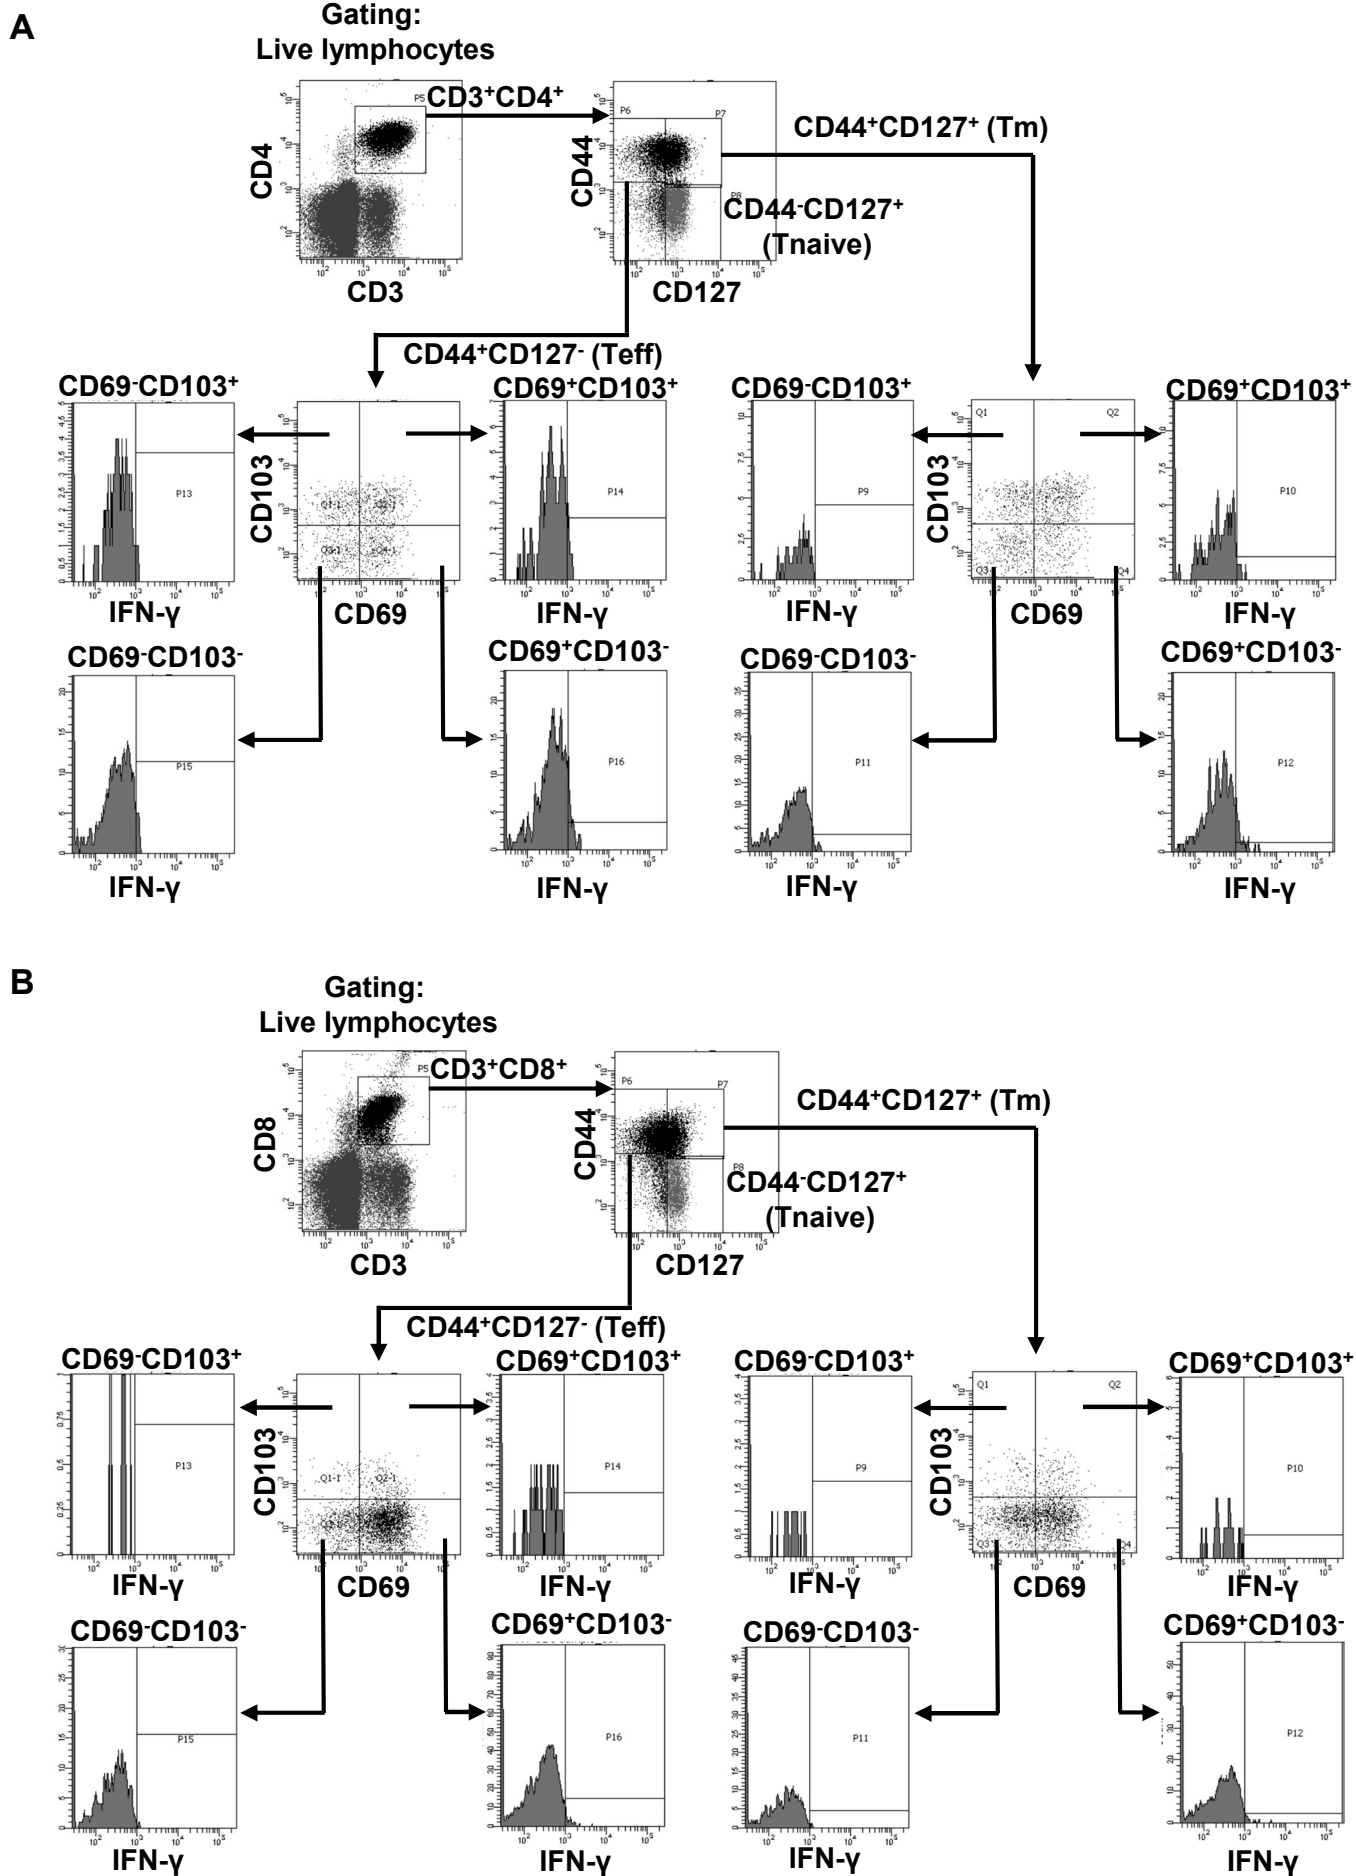

**Supplementary fig. 1. Gating strategy of T cells**

WT mice were infected intratracheally with *C. deneoformans*. Lung leukocytes were prepared on day 3 and each T cell subset was analyzed using flow cytometry. Representative histograms from four mice are shown. The percent represents the mean  $\pm$  standard deviation of four mice.
